# Supplementary material
Source: publisher site journal article supplement (https://www.dovepress.com/article/305937)
Supplement: Supplementary file 1 [file get_supplementary_file.php]

**1.After the outbreak of COVID-19, do you think the following risks are likely to happen before you run the marathon?**

|  | **items** | **completely impossible** | **impossible** | **uncertain** | **possible** | **very possible** |
| --- | --- | --- | --- | --- | --- | --- |
| PSU1 | Exercise diseases, such as knee joint injury and muscle strain. |  |  |  |  |  |
| PSU2 | Respiratory diseases, such as new coronary pneumonia and respiratory disorders (caused by smog) . |  |  |  |  |  |
| PSU3 | Blood circulatory diseases, such as arrhythmia, myocardial fibrosis and sudden cardiac death. |  |  |  |  |  |

**2. After the epidemic , do you think the following risks will affect your participation seriously before you run the marathon?**

|  | **items** | **not serious at all** | **not serious** | **uncertain** | **serious** | **very serious** |
| --- | --- | --- | --- | --- | --- | --- |
| PSE1 | Exercise diseases, such as knee joint injury and muscle strain. |  |  |  |  |  |
| PSE2 | Respiratory diseases, such as new coronary pneumonia and respiratory disorders (caused by smog) . |  |  |  |  |  |
| PSE3 | Blood circulatory diseases, such as arrhythmia, myocardial fibrosis and sudden cardiac death. |  |  |  |  |  |

**3.What do you think of the effects of prevention measures in reducing the following risks?**

|  | **items** | **no effect at all** | **no effect** | **uncertain** | **effective** | **very effective** |
| --- | --- | --- | --- | --- | --- | --- |
| HBE1 | Exercise diseases, such as knee joint injury and muscle strain. |  |  |  |  |  |
| HBE2 | Respiratory diseases, such as new coronary pneumonia and respiratory disorders (caused by smog) . |  |  |  |  |  |
| HBE3 | Blood circulatory diseases, such as arrhythmia, myocardial fibrosis and sudden cardiac death. |  |  |  |  |  |

**4.Before running a marathon, how confident are you that you can take precautions to reduce the following risks?**

|  | **items** | **totally unsure** | **unsure** | **uncertain** | **sure** | **very sure** |
| --- | --- | --- | --- | --- | --- | --- |
| SE1 | Exercise diseases, such as knee joint injury and muscle strain. |  |  |  |  |  |
| SE2 | Respiratory diseases, such as new coronary pneumonia and respiratory disorders (caused by smog) . |  |  |  |  |  |
| SE3 | Blood circulatory diseases, such as arrhythmia, myocardial fibrosis and sudden cardiac death. |  |  |  |  |  |

**5.What is your attitude towards taking precautions before running a marathon?**

|  | **items** | **strongly disagree** | **disagree** | **uncertain** | **agree** | **strongly agree** |
| --- | --- | --- | --- | --- | --- | --- |
| AT1 | I think it's wise to take preventive measures before I run marathon. |  |  |  |  |  |
| AT2 | I think it's right to take precautions before I run marathon. |  |  |  |  |  |
| AT3 | It is very necessary for me to take preventive measures ahead of time. |  |  |  |  |  |
| AT4 | The precautionary measures I made for this run marathon can effectively reduce risks. |  |  |  |  |  |
| AT5 | I am satisfied with the precautions I made for this marathon. |  |  |  |  |  |

**6.How well did you prepare for the following risks before running a marathon?**

|  | **items** | **no prevention at all** | **no prevention** | **uncertain** | **prevention** | **very sufficient prevention** |
| --- | --- | --- | --- | --- | --- | --- |
| PBE1 | Exercise diseases, such as knee joint injury and muscle strain. |  |  |  |  |  |
| PBE2 | Respiratory diseases, such as new coronary pneumonia and respiratory disorders (caused by smog) . |  |  |  |  |  |
| PBE3 | Blood circulatory diseases, such as arrhythmia, myocardial fibrosis and sudden cardiac death. |  |  |  |  |  |

**7.Please recall that during your quarantine, you felt that_________**

|  | **items** | **strongly disagree** | **disagree** | **uncertain** | **agree** | **strongly agree** |
| --- | --- | --- | --- | --- | --- | --- |
| HV1 | If you don't have your health you don't have anything. |  |  |  |  |  |
| HV2 | There are many things I care about more than my health. |  |  |  |  |  |
| HV3 | Good health is of only minor Importance in a happy life. |  |  |  |  |  |
| HV4 | There are few things more important than good health. |  |  |  |  |  |
